# Supplementary material
Source: publisher site journal article supplement (https://cdn.jamanetwork.com/ama/content_public/journal/psych/934895/yoi150081supp1_prod.pdf)

## Supplementary Online Content

Scott KM, Lim C, Al-Hamzawi A, et al. Association of mental disorders with subsequent chronic physical conditions: World Mental Health Surveys from 17 countries. *JAMA Psychiatry*. Published online December 23, 2015. doi:10.1001/jamapsychiatry.2015.2688.

**eTable 1.** Population-Attributable Risk Proportions (PARPs) of Physical Outcomes Associated With Mental Disorders

**eTable 2.** Tests for Heterogeneity of Multivariate Associations Across Countries (Survey Sites)

**eTable 3.** Significance of Interactions of *DSM-IV* Mental Disorder Classes With Survey Sites in Association With Physical Condition Onsets

**eTable 4.** Odds Ratios for the Interaction of *DSM-IV* Mental Disorder Classes and Person-years in Association With Physical Condition Onsets

**eFigure 1.** Multivariate Associations (Odds Ratios) of *DSM-IV* Mood Disorders With Subsequent Onset of Heart Disease, by Survey Sites

**eFigure 2.** Multivariate Associations (Odds Ratios) of *DSM-IV* Anxiety Disorders With Subsequent Onset of Heart Disease, by Survey Sites

This supplementary material has been provided by the authors to give readers additional information about their work.

**eTable 1. Population-Attributable Risk Proportions (PARPs) of Physical Outcomes Associated With Mental Disorders**

|                                                                                                      | Type of chronic physical conditions |                  |               |        |                     |          |        |                      |              |        |
|------------------------------------------------------------------------------------------------------|-------------------------------------|------------------|---------------|--------|---------------------|----------|--------|----------------------|--------------|--------|
|                                                                                                      | Arthritis                           | Any chronic pain | Heart disease | Stroke | High blood pressure | Diabetes | Asthma | Chronic lung disease | Peptic ulcer | Cancer |
| <b>Step 1: Odds Ratios<sup>a</sup></b>                                                               |                                     |                  |               |        |                     |          |        |                      |              |        |
| Any mood disorder                                                                                    | 1.61                                | 1.73             | 1.51          | 1.60   | 1.35                | 1.39     | 1.55   | 2.13                 | 1.72         | 1.23   |
| Any anxiety disorder                                                                                 | 1.54                                | 1.92             | 1.78          | 1.63   | 1.46                | 1.28     | 1.50   | 1.73                 | 1.83         | 1.20   |
| Any impulse-control disorder                                                                         | 1.61                                | 2.20             | 1.60          | 1.98   | 1.65                | 2.09     | 1.53   | 2.57                 | 1.91         | 1.56   |
| Any substance-use disorder                                                                           | 1.59                                | 1.47             | 1.70          | 2.20   | 1.61                | 1.37     | 1.67   | 2.41                 | 1.63         | 1.38   |
| <b>Step 2: Risk of the physical outcome in the non-exposed group (those without mental disorder)</b> |                                     |                  |               |        |                     |          |        |                      |              |        |
| Any mood disorder                                                                                    | 0.12                                | 0.32             | 0.04          | 0.01   | 0.12                | 0.04     | 0.02   | 0.01                 | 0.05         | 0.02   |
| Any anxiety disorder                                                                                 | 0.12                                | 0.30             | 0.04          | 0.01   | 0.12                | 0.03     | 0.02   | 0.01                 | 0.04         | 0.02   |
| Any impulse-control disorder                                                                         | 0.14                                | 0.36             | 0.05          | 0.01   | 0.14                | 0.04     | 0.03   | 0.01                 | 0.06         | 0.03   |
| Any substance-use disorder                                                                           | 0.13                                | 0.35             | 0.05          | 0.01   | 0.13                | 0.04     | 0.03   | 0.01                 | 0.05         | 0.02   |
| <b>Step 3: Relative Risks<sup>b</sup></b>                                                            |                                     |                  |               |        |                     |          |        |                      |              |        |
| Any mood disorder                                                                                    | 1.50                                | 1.40             | 1.48          | 1.59   | 1.29                | 1.37     | 1.53   | 2.11                 | 1.66         | 1.22   |
| Any anxiety disorder                                                                                 | 1.45                                | 1.50             | 1.72          | 1.62   | 1.39                | 1.27     | 1.48   | 1.72                 | 1.77         | 1.20   |
| Any impulse-control disorder                                                                         | 1.48                                | 1.54             | 1.55          | 1.95   | 1.51                | 2.00     | 1.51   | 2.52                 | 1.82         | 1.54   |
| Any substance-use disorder                                                                           | 1.47                                | 1.26             | 1.65          | 2.17   | 1.49                | 1.35     | 1.64   | 2.37                 | 1.58         | 1.37   |
| <b>Step 4: Proportion of those in the sample with the predictor</b>                                  |                                     |                  |               |        |                     |          |        |                      |              |        |
| Any mood disorder                                                                                    | 0.14                                | 0.14             | 0.14          | 0.14   | 0.14                | 0.14     | 0.14   | 0.14                 | 0.14         | 0.14   |
| Any anxiety disorder                                                                                 | 0.17                                | 0.17             | 0.17          | 0.17   | 0.17                | 0.17     | 0.17   | 0.17                 | 0.17         | 0.17   |
| Any impulse-control disorder                                                                         | 0.03                                | 0.03             | 0.03          | 0.03   | 0.03                | 0.03     | 0.03   | 0.03                 | 0.03         | 0.03   |
| Any substance-use disorder                                                                           | 0.09                                | 0.09             | 0.09          | 0.09   | 0.09                | 0.09     | 0.08   | 0.09                 | 0.09         | 0.09   |
| <b>Step 5: Population attributable risk proportion (%)<sup>c</sup></b>                               |                                     |                  |               |        |                     |          |        |                      |              |        |
| Any mood disorder                                                                                    | 6.4%                                | 5.2%             | 6.2%          | 7.6%   | 3.9%                | 4.9%     | 6.7%   | 13.3%                | 8.3%         | 3.0%   |
| Any anxiety disorder                                                                                 | 7.1%                                | 7.9%             | 11.1%         | 9.6%   | 6.2%                | 4.4%     | 7.6%   | 11.0%                | 11.6%        | 3.2%   |
| Any impulse-control disorder                                                                         | 1.5%                                | 1.7%             | 1.7%          | 3.0%   | 1.6%                | 3.1%     | 1.6%   | 4.6%                 | 2.6%         | 1.7%   |
| Any substance-use disorder                                                                           | 4.0%                                | 2.2%             | 5.3%          | 9.3%   | 4.1%                | 3.0%     | 5.2%   | 10.7%                | 4.8%         | 3.1%   |

<sup>a</sup>Odds ratios from the bivariate models in Table 3.

<sup>b</sup>Relative risk = Odds ratio / (1 - risk from step 2 + (risk from step 2 \* odds ratio)).

<sup>c</sup>PARP= (p from step 4)\*(RR - 1) / ([p from step 4\*(RR -1)] + 1).

eTable 2. Tests for Heterogeneity of Multivariate Associations Across Countries (Survey Sites)

| Type of mental disorder      | Heterogeneity test | Arthritis | Any chronic pain | Heart disease | Stroke  | High blood pressure | Diabetes | Asthma  | Chronic lung disease | Peptic ulcer | Cancer  |
|------------------------------|--------------------|-----------|------------------|---------------|---------|---------------------|----------|---------|----------------------|--------------|---------|
| Any mood disorder            | I <sup>2</sup>     | 12.1%     | 61.7%            | 41.3%         | 48.8%   | 49.7%               | 0.0%     | 0.0%    | 8.1%                 | 0.0%         | 29.0%   |
|                              | [P-value]          | [0.310]   | [0.000]          | [0.035]       | [0.082] | [0.009]             | [0.576]  | [0.617] | [0.358]              | [0.648]      | [0.169] |
| Any anxiety disorder         | I <sup>2</sup>     | 0.0%      | 23.6%            | 49.2%         | 61.1%   | 14.0%               | 13.7%    | 9.6%    | 10.2%                | 37.5%        | 44.7%   |
|                              | [P-value]          | [0.455]   | [0.175]          | [0.010]       | [0.012] | [0.286]             | [0.289]  | [0.340] | [0.332]              | [0.055]      | [0.036] |
| Any impulse-control disorder | I <sup>2</sup>     | 0.0%      | 0.0%             | 0.0%          | 51.7%   | 45.3%               | 16.5%    | 36.6%   | 72.6%                | 0.0%         | 57.9%   |
|                              | [P-value]          | [0.803]   | [0.687]          | [0.991]       | [0.150] | [0.044]             | [0.309]  | [0.061] | [0.026]              | [0.738]      | [0.123] |
| Any substance-use disorder   | I <sup>2</sup>     | 32.1%     | 1.5%             | 24.2%         | 0.0%    | 64.1%               | 23.0%    | 37.9%   | 49.0%                | 38.7%        | 14.6%   |
|                              | [P-value]          | [0.100]   | [0.436]          | [0.175]       | [0.689] | [0.000]             | [0.238]  | [0.063] | [0.067]              | [0.076]      | [0.321] |

I<sup>2</sup> = percentage of total variation across sites that is due to heterogeneity rather than chance.

eTable 3. Significance of Interactions of DSM-IV Mental Disorder Classes With Survey Sites in Association With Physical Condition Onsets

| Interaction between mental disorder and survey sites | Type of chronic physical condition |                  |               |        |                     |          |        |                      |              |        |
|------------------------------------------------------|------------------------------------|------------------|---------------|--------|---------------------|----------|--------|----------------------|--------------|--------|
|                                                      | Arthritis                          | Any chronic pain | Heart disease | Stroke | High blood pressure | Diabetes | Asthma | Chronic lung disease | Peptic ulcer | Cancer |
|                                                      | P-values for each interaction term |                  |               |        |                     |          |        |                      |              |        |
| <b>Any mood disorder</b>                             |                                    |                  |               |        |                     |          |        |                      |              |        |
| Colombia                                             | NS                                 | NS               | NS            | -      | NS                  | NS       | NS     | -                    | NS           | NS     |
| PRC Shen Zhen                                        | NS                                 | <.001**          | NS            | -      | NS                  | NS       | -      | -                    | 0.030*       | -      |
| Iraq                                                 | NS                                 | NS               | NS            | -      | NS                  | NS       | -      | -                    | NS           | -      |
| Mexico                                               | NS                                 | 0.029*           | 0.020*        | -      | NS                  | NS       | -      | -                    | NS           | -      |
| Romania                                              | NS                                 | NS               | NS            | -      | NS                  | NS       | NS     | -                    | NS           | -      |
| Peru                                                 | NS                                 | NS               | NS            | -      | NS                  | NS       | NS     | NS                   | NS           | -      |
| Belgium                                              | NS                                 | NS               | 0.048*        | -      | 0.032*              | NS       | NS     | NS                   | NS           | NS     |
| Italy                                                | NS                                 | NS               | NS            | -      | NS                  | NS       | NS     | NS                   | NS           | NS     |
| Netherlands                                          | NS                                 | NS               | NS            | NS     | NS                  | 0.021*   | NS     | NS                   | NS           | NS     |
| Spain                                                | NS                                 | NS               | NS            | NS     | NS                  | NS       | NS     | NS                   | NS           | NS     |
| Japan                                                | NS                                 | NS               | NS            | -      | NS                  | NS       | -      | -                    | NS           | -      |
| New Zealand                                          | NS                                 | <.001**          | NS            | 0.010* | NS                  | NS       | NS     | NS                   | NS           | NS     |
| Northern Ireland                                     | NS                                 | NS               | NS            | NS     | NS                  | NS       | NS     | -                    | NS           | 0.049* |
| Portugal                                             | NS                                 | NS               | NS            | NS     | NS                  | NS       | NS     | NS                   | NS           | NS     |
| Poland                                               | 0.031*                             | NS               | NS            | -      | NS                  | NS       | NS     | NS                   | NS           | -      |
| Murcia                                               | NS                                 | NS               | NS            | -      | NS                  | NS       | NS     | NS                   | -            | 0.014* |
| Medellin                                             | NS                                 | NS               | NS            | -      | NS                  | NS       | -      | NS                   | NS           | NS     |
| <b>Any anxiety disorder</b>                          |                                    |                  |               |        |                     |          |        |                      |              |        |
| Colombia                                             | 0.026*                             | NS               | NS            | -      | NS                  | NS       | NS     | -                    | NS           | NS     |
| PRC Shen Zhen                                        | NS                                 | NS               | NS            | -      | NS                  | NS       | -      | NS                   | NS           | -      |
| Iraq                                                 | NS                                 | NS               | 0.003**       | -      | 0.049*              | NS       | NS     | -                    | NS           | -      |
| Mexico                                               | NS                                 | NS               | NS            | -      | 0.001**             | NS       | -      | NS                   | NS           | -      |
| Romania                                              | NS                                 | NS               | NS            | 0.014* | NS                  | NS       | NS     | -                    | NS           | NS     |
| Peru                                                 | NS                                 | NS               | NS            | -      | NS                  | NS       | NS     | NS                   | NS           | -      |
| Belgium                                              | NS                                 | NS               | NS            | -      | NS                  | NS       | -      | NS                   | NS           | NS     |
| Italy                                                | NS                                 | NS               | NS            | -      | NS                  | NS       | NS     | NS                   | NS           | NS     |
| Netherlands                                          | NS                                 | NS               | NS            | -      | NS                  | NS       | NS     | -                    | NS           | NS     |
| Spain                                                | NS                                 | NS               | NS            | NS     | NS                  | NS       | NS     | NS                   | NS           | NS     |
| Japan                                                | NS                                 | NS               | NS            | -      | NS                  | NS       | NS     | NS                   | NS           | NS     |
| New Zealand                                          | NS                                 | NS               | NS            | 0.019* | NS                  | NS       | NS     | NS                   | NS           | 0.042* |
| Northern Ireland                                     | NS                                 | NS               | NS            | NS     | NS                  | 0.026*   | NS     | -                    | NS           | NS     |
| Portugal                                             | NS                                 | 0.018*           | NS            | NS     | NS                  | NS       | NS     | NS                   | NS           | NS     |
| Poland                                               | NS                                 | NS               | 0.008**       | NS     | NS                  | NS       | NS     | NS                   | NS           | NS     |
| Murcia                                               | NS                                 | NS               | NS            | -      | NS                  | 0.010*   | NS     | NS                   | NS           | NS     |
| Medellin                                             | NS                                 | NS               | NS            | NS     | NS                  | NS       | NS     | NS                   | NS           | NS     |
| <b>Any impulse control disorder</b>                  |                                    |                  |               |        |                     |          |        |                      |              |        |
| Colombia                                             | NS                                 | NS               | NS            | -      | NS                  | NS       | -      | -                    | NS           | -      |
| PRC Shen Zhen                                        | NS                                 | NS               | NS            | -      | 0.038*              | -        | -      | -                    | NS           | -      |
| Iraq                                                 | NS                                 | <.001**          | -             | -      | NS                  | -        | -      | -                    | -            | -      |
| Mexico                                               | -                                  | NS               | -             | -      | 0.025*              | -        | -      | -                    | -            | -      |
| Romania                                              | -                                  | NS               | -             | -      | NS                  | -        | -      | -                    | -            | -      |
| Peru                                                 | NS                                 | NS               | -             | -      | NS                  | -        | NS     | 0.012*               | NS           | -      |
| Belgium                                              | -                                  | NS               | -             | -      | -                   | -        | -      | -                    | -            | -      |
| Italy                                                | -                                  | NS               | -             | -      | -                   | -        | -      | -                    | -            | -      |
| Netherlands                                          | -                                  | NS               | -             | -      | -                   | -        | -      | -                    | -            | -      |
| Spain                                                | -                                  | -                | -             | -      | -                   | -        | -      | -                    | -            | -      |
| Japan                                                | -                                  | NS               | -             | -      | NS                  | -        | -      | -                    | -            | -      |
| New Zealand                                          | NS                                 | NS               | NS            | NS     | NS                  | NS       | NS     | NS                   | NS           | NS     |
| Northern Ireland                                     | NS                                 | NS               | -             | -      | NS                  | -        | NS     | -                    | NS           | -      |
| Portugal                                             | NS                                 | NS               | NS            | -      | NS                  | NS       | -      | -                    | NS           | -      |
| Poland                                               | NS                                 | NS               | NS            | -      | NS                  | NS       | -      | -                    | -            | -      |
| Murcia                                               | -                                  | -                | -             | -      | -                   | -        | -      | -                    | -            | -      |
| Medellin                                             | -                                  | -                | -             | -      | -                   | -        | -      | -                    | -            | -      |
| <b>Any substance-use disorder</b>                    |                                    |                  |               |        |                     |          |        |                      |              |        |

|                           |                      |                       |                      |                     |                      |                      |                      |                      |                      |                      |
|---------------------------|----------------------|-----------------------|----------------------|---------------------|----------------------|----------------------|----------------------|----------------------|----------------------|----------------------|
| Colombia                  | NS                   | NS                    | NS                   | -                   | NS                   | -                    | -                    | -                    | NS                   | -                    |
| PRC Shen Zhen             | -                    | -                     | -                    | -                   | -                    | -                    | -                    | -                    | -                    | -                    |
| Iraq                      | -                    | -                     | -                    | -                   | -                    | -                    | -                    | -                    | -                    | -                    |
| Mexico                    | NS                   | NS                    | NS                   | -                   | NS                   | NS                   | -                    | -                    | NS                   | -                    |
| Romania                   | NS                   | NS                    | <.001**              | -                   | NS                   | -                    | -                    | -                    | -                    | -                    |
| Peru                      | NS                   | NS                    | -                    | -                   | NS                   | -                    | -                    | NS                   | NS                   | -                    |
| Belgium                   | NS                   | NS                    | NS                   | -                   | NS                   | -                    | -                    | -                    | NS                   | -                    |
| Italy                     | NS                   | NS                    | -                    | -                   | 0.048*               | -                    | -                    | -                    | -                    | -                    |
| Netherlands               | NS                   | 0.008**               | NS                   | -                   | NS                   | -                    | NS                   | -                    | NS                   | -                    |
| Spain                     | NS                   | NS                    | -                    | -                   | NS                   | -                    | -                    | -                    | -                    | -                    |
| Japan                     | NS                   | NS                    | NS                   | -                   | 0.001**              | 0.030*               | NS                   | NS                   | NS                   | -                    |
| New Zealand               | NS                   | NS                    | 0.003**              | NS                  | 0.015*               | NS                   | NS                   | NS                   | NS                   | NS                   |
| Northern Ireland          | 0.049*               | NS                    | NS                   | NS                  | NS                   | NS                   | NS                   | -                    | NS                   | NS                   |
| Portugal                  | NS                   | NS                    | NS                   | -                   | 0.022*               | NS                   | NS                   | NS                   | 0.011*               | NS                   |
| Poland                    | NS                   | NS                    | 0.006**              | NS                  | NS                   | NS                   | NS                   | NS                   | NS                   | NS                   |
| Murcia                    | NS                   | NS                    | NS                   | -                   | NS                   | 0.031*               | -                    | -                    | NS                   | -                    |
| Medellin                  | NS                   | NS                    | NS                   | -                   | NS                   | NS                   | 0.042*               | NS                   | NS                   | -                    |
|                           |                      |                       |                      |                     |                      |                      |                      |                      |                      |                      |
| <b>Main effects model</b> |                      |                       |                      |                     |                      |                      |                      |                      |                      |                      |
| AIC                       | 77729.2 <sup>b</sup> | 184813.6              | 31561.7 <sup>b</sup> | 8599.7 <sup>b</sup> | 77343.2 <sup>b</sup> | 27914.4 <sup>b</sup> | 20849.6 <sup>b</sup> | 10286.8 <sup>b</sup> | 40618.8 <sup>b</sup> | 17842.3 <sup>b</sup> |
| BIC                       | 78126.4 <sup>b</sup> | 185208.4 <sup>b</sup> | 31961.0 <sup>b</sup> | 8970.9 <sup>b</sup> | 77741.5 <sup>b</sup> | 28313.9 <sup>b</sup> | 21248.1 <sup>b</sup> | 10686.2 <sup>b</sup> | 41018.8 <sup>b</sup> | 18241.9 <sup>b</sup> |
| <b>Interaction model</b>  |                      |                       |                      |                     |                      |                      |                      |                      |                      |                      |
| AIC                       | 77765.2              | 184695.2 <sup>b</sup> | 31596.1              | 8649.7              | 77351.3              | 27966.3              | 20923.8              | 10346.5              | 40674.4              | 17906.9              |
| BIC                       | 78994.2              | 185916.6              | 32831.4              | 9763.1              | 78583.5              | 29202.3              | 22156.7              | 11582.3              | 41911.7              | 19143.4              |

\*\*Significant at the .05 level, \*Significant at the .01 level, two-sided test. NS = not significant

<sup>a</sup>Multivariate models included interaction terms between each mental disorder class and survey sites. Only the p-values for the interaction terms are shown in the table. All models control for mental disorder class, country, sex, person-year, smoking (current/ever/never) and respondent's education history.

<sup>b</sup>Model is better in terms of AIC/BIC values

"-" was inserted for countries that did not assess the disorder or where there were fewer than 5 cases in the cross classification of mental disorder and physical condition.

**eTable 4. Odds ratios for the Interaction of DSM-IV Mental Disorder Classes and Person-Years in Association With Physical Condition Onsets<sup>a</sup>**

| Type of mental disorder      | Type of chronic physical condition |             |                  |             |               |             |              |             |                     |             |              |             |              |             |                      |             |              |             |              |             |
|------------------------------|------------------------------------|-------------|------------------|-------------|---------------|-------------|--------------|-------------|---------------------|-------------|--------------|-------------|--------------|-------------|----------------------|-------------|--------------|-------------|--------------|-------------|
|                              | Arthritis                          |             | Any chronic pain |             | Heart disease |             | Stroke       |             | High blood pressure |             | Diabetes     |             | Asthma       |             | Chronic lung disease |             | Peptic ulcer |             | Cancer       |             |
|                              | OR                                 | (95% CI)    | OR               | (95% CI)    | OR            | (95% CI)    | OR           | (95% CI)    | OR                  | (95% CI)    | OR           | (95% CI)    | OR           | (95% CI)    | OR                   | (95% CI)    | OR           | (95% CI)    | OR           | (95% CI)    |
| Any mood disorder            | <b>0.99*</b>                       | (0.98-1.00) | <b>0.99*</b>     | (0.98-0.99) | <b>0.99*</b>  | (0.98-1.00) | <b>0.99</b>  | (0.97-1.01) | <b>0.99*</b>        | (0.99-1.00) | <b>0.99*</b> | (0.98-1.00) | <b>0.98*</b> | (0.97-0.99) | <b>0.99</b>          | (0.98-1.01) | <b>0.98*</b> | (0.98-0.99) | <b>0.98*</b> | (0.97-0.99) |
| Any anxiety disorder         | <b>1.00</b>                        | (1.00-1.01) | <b>0.99*</b>     | (0.98-0.99) | <b>1.00</b>   | (0.99-1.00) | <b>0.98*</b> | (0.97-0.99) | <b>1.00</b>         | (1.00-1.01) | <b>1.00</b>  | (0.99-1.00) | <b>1.00</b>  | (0.99-1.01) | <b>1.01*</b>         | (1.00-1.03) | <b>0.99</b>  | (0.98-1.00) | <b>0.99</b>  | (0.98-1.00) |
| Any impulse-control disorder | <b>1.01</b>                        | (1.00-1.03) | <b>0.99*</b>     | (0.98-1.00) | <b>1.00</b>   | (0.98-1.02) | <b>1.02</b>  | (1.00-1.05) | <b>1.00</b>         | (0.99-1.02) | <b>1.01</b>  | (0.99-1.03) | <b>1.00</b>  | (0.98-1.02) | <b>0.97*</b>         | (0.95-1.00) | <b>0.98*</b> | (0.97-1.00) | <b>1.00*</b> | (0.98-1.03) |
| Any substance-use disorder   | <b>1.00</b>                        | (0.99-1.01) | <b>0.99*</b>     | (0.99-1.00) | <b>0.99</b>   | (0.98-1.00) | <b>1.01</b>  | (0.99-1.03) | <b>1.00</b>         | (0.99-1.01) | <b>1.00</b>  | (0.99-1.01) | <b>1.01</b>  | (0.99-1.03) | <b>1.01</b>          | (0.98-1.03) | <b>0.97*</b> | (0.96-0.99) | <b>1.02*</b> | (1.00-1.04) |

\*Significant at the .05 level, two-sided test.

<sup>a</sup>Multivariate models included interaction terms between each mental disorder class and person-years. Only interaction odds ratios are shown in the table. All models included mental disorder classes, person year age-cohorts, sex, country, smoking (current/ever/never) and respondent's education history.

eFigure 1. Multivariate Associations (Odds Ratios) of *DSM-IV* Mood Disorders With Subsequent Onset of Heart Disease, by Survey Sites.

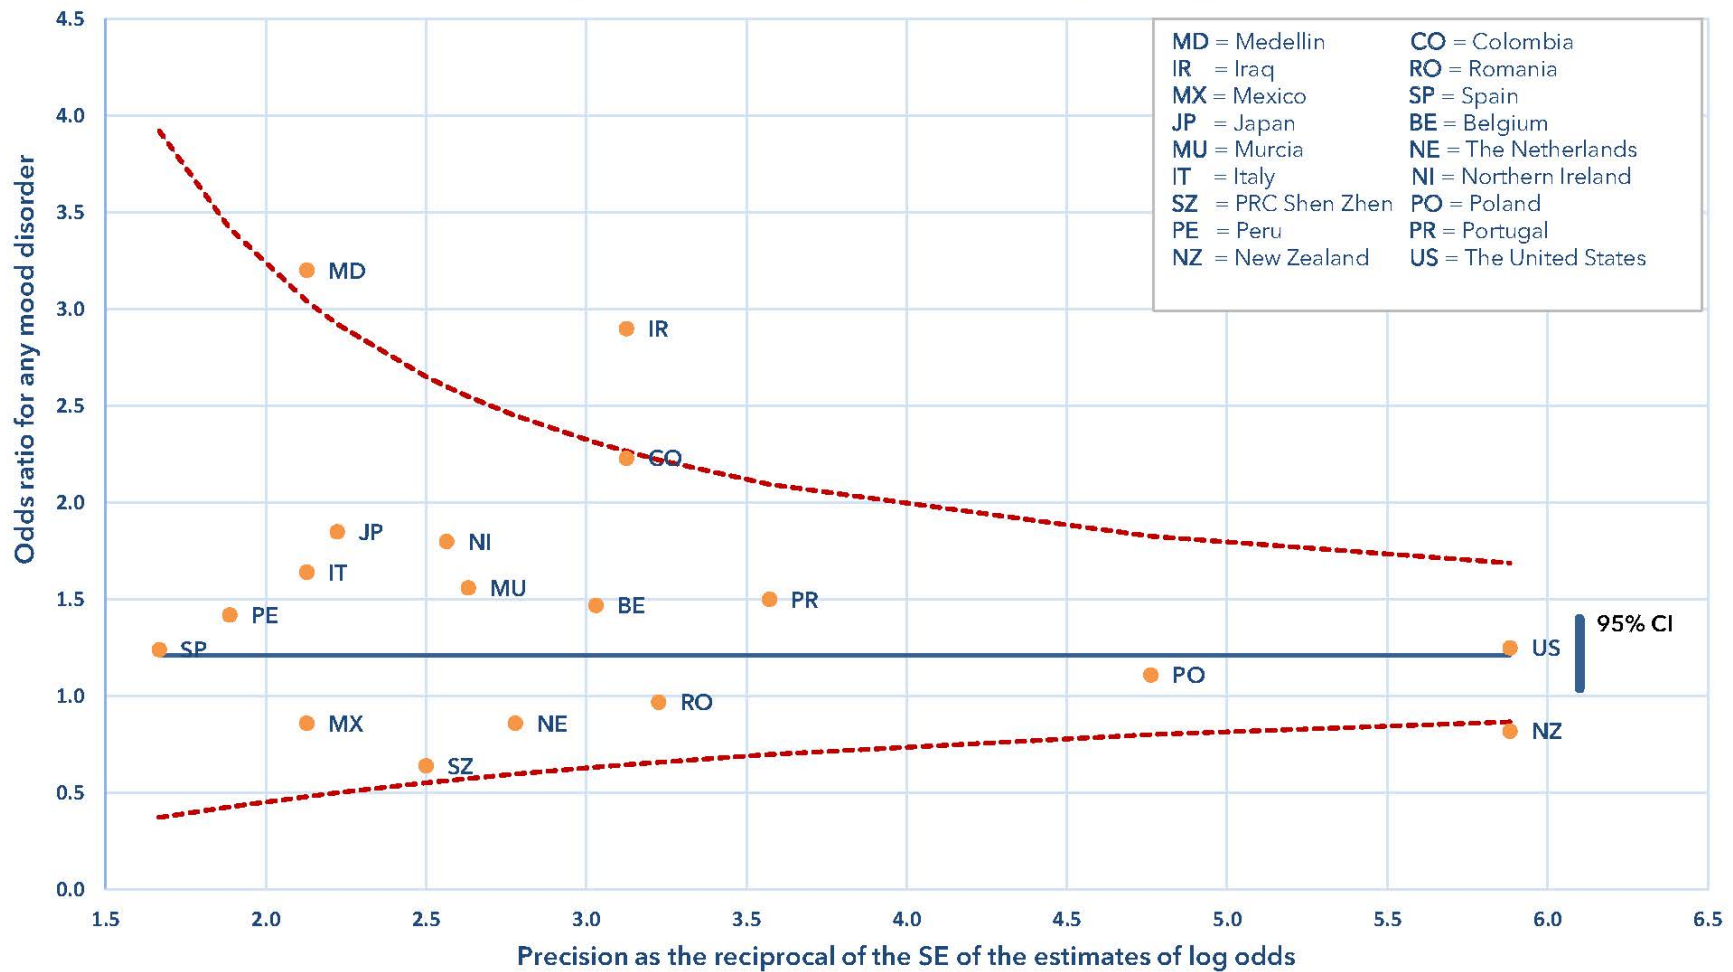

eFigure 2. Multivariate Associations (Odds Ratios) of *DSM-IV* Anxiety Disorders With Subsequent Onset of Heart Disease, by Survey Sites

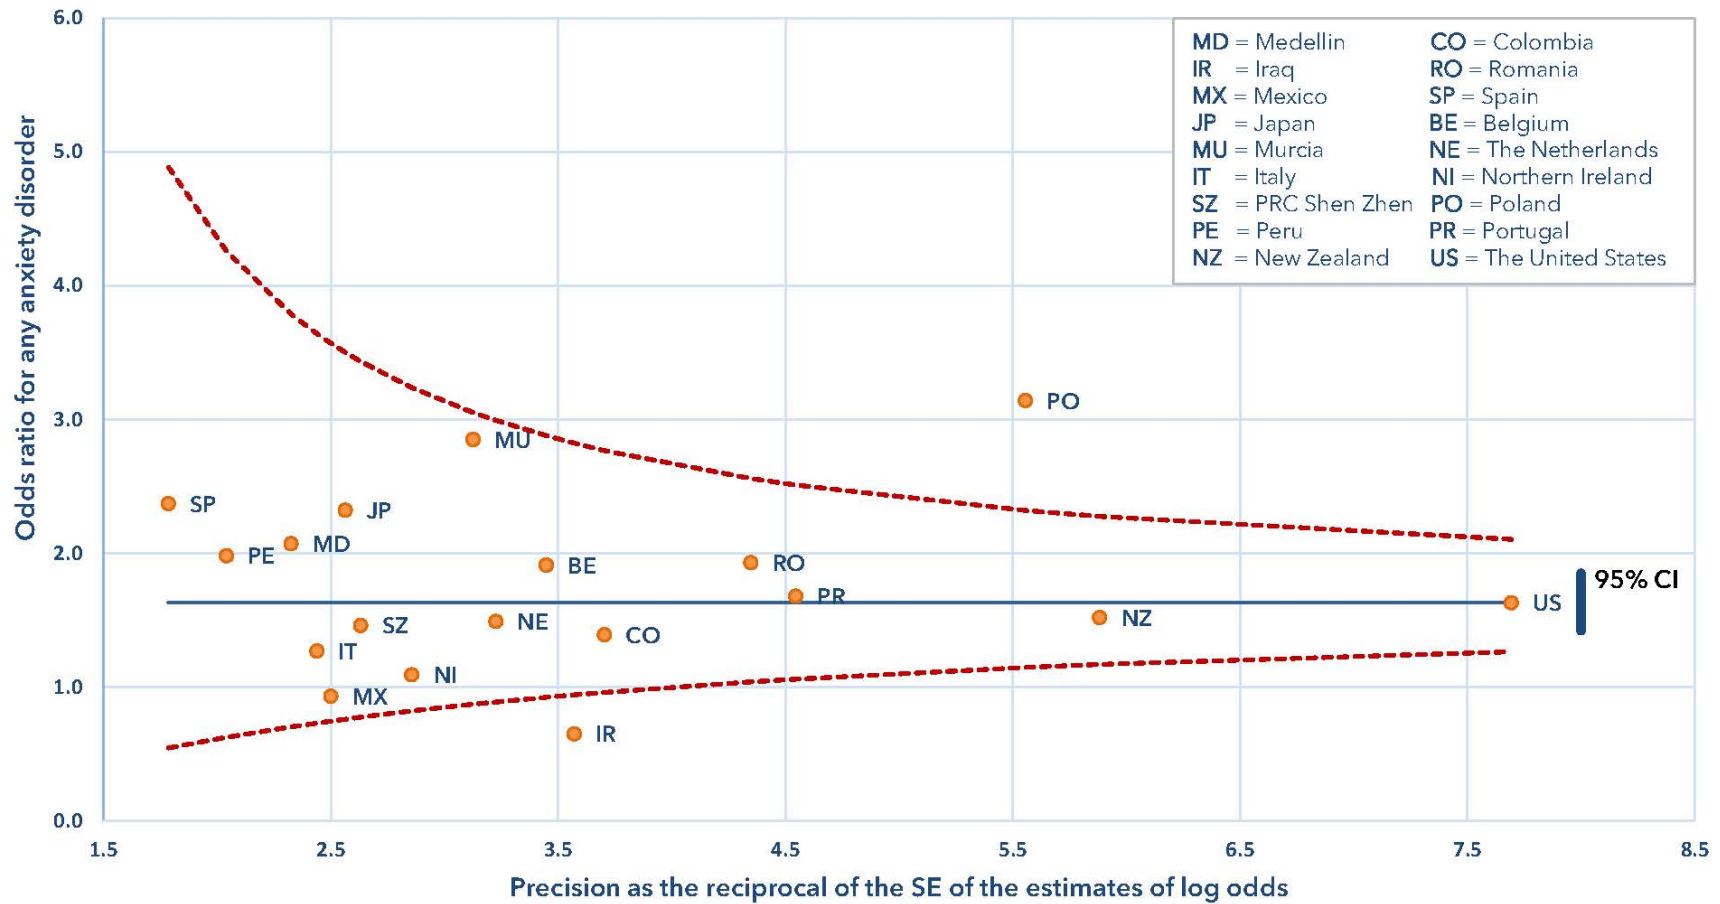

Supplement: Supplementary file 1 [file yoi150081supp1_prod.pdf]
